# Supplementary material for: Noni fruit extract ameliorates alcohol-induced hangover symptoms by reducing the concentrations of alcohol and acetaldehyde in a Sprague Dawley rat model and a human intervention study
Source: Royal Society of Chemistry journal article supplement (doi:10.1039/d2fo02835b), 2023-01-01
Supplement: d2fo02835b1.pdf [file d2fo02835b1.pdf]

**Figure S1**

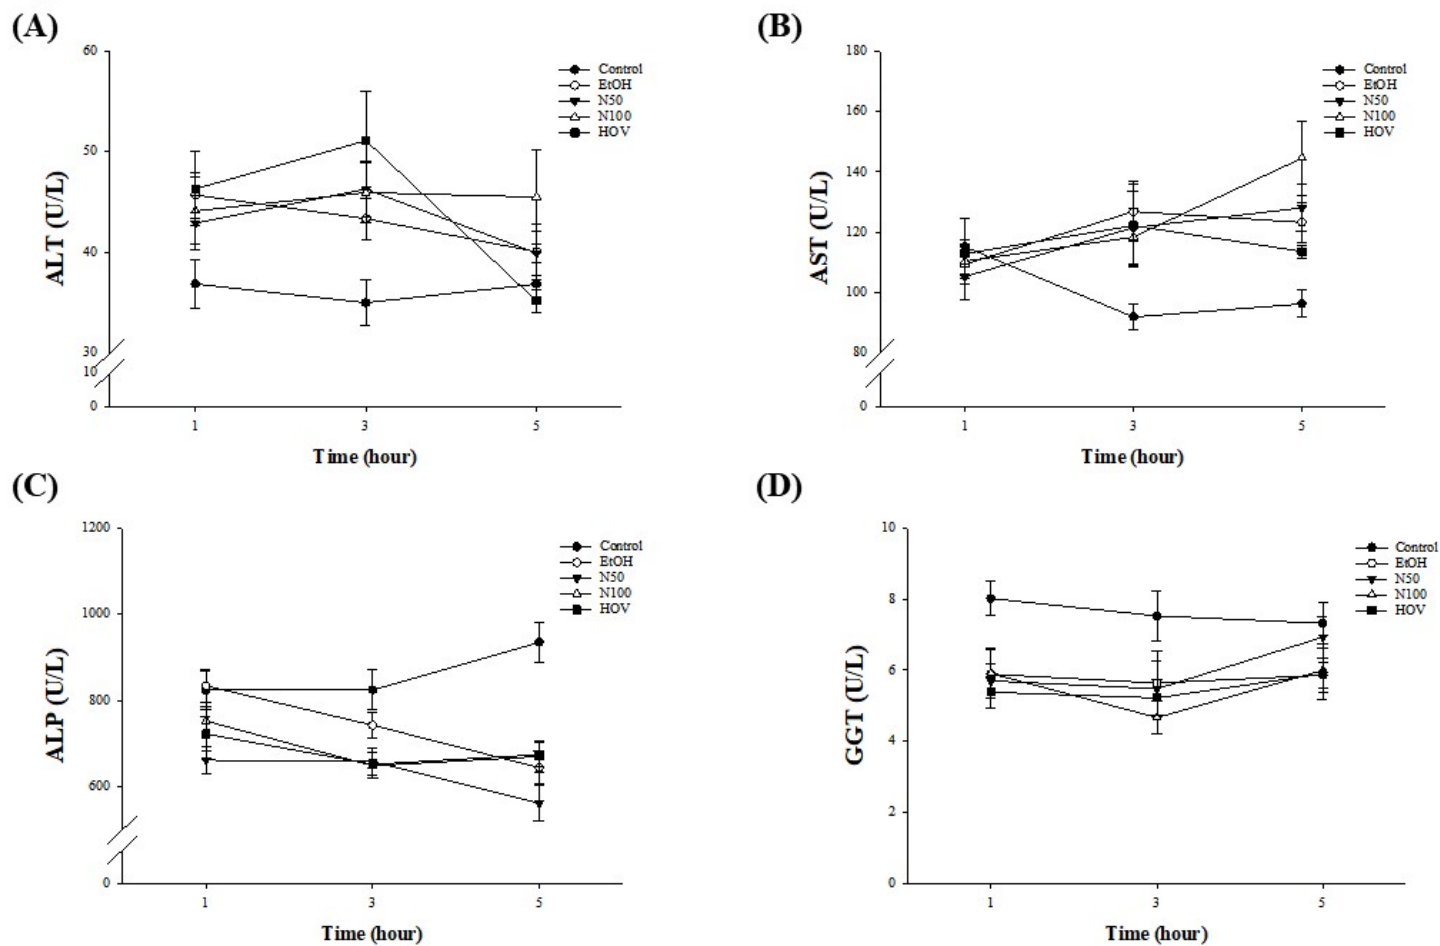

**Figure S2**

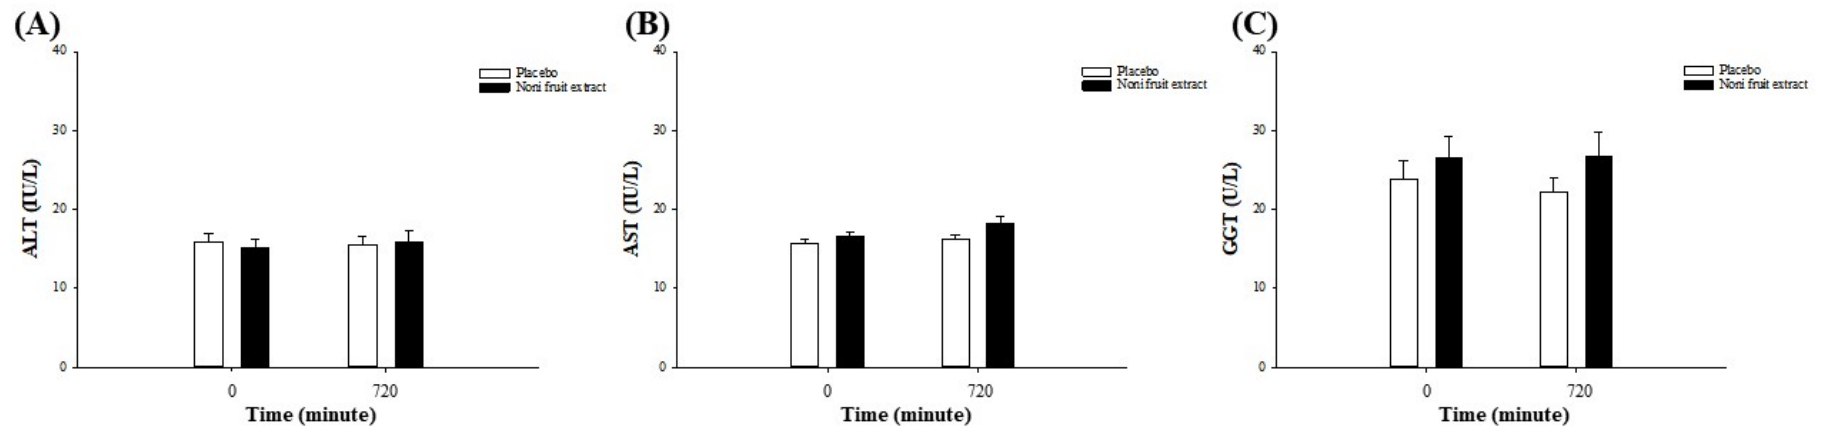

**Table S1. Hematological test, blood chemical test, and urine test at baseline**

| <b>Variables</b>                  | <b>N=30<sup>1)</sup></b> | <b>Normal range<sup>2)</sup></b> |
|-----------------------------------|--------------------------|----------------------------------|
| <b>Hematological test</b>         |                          |                                  |
| WBC (10 <sup>3</sup> /μL)         | 6.1 ± 0.2                | 3.7 - 9.8                        |
| RBC (10 <sup>6</sup> /μL)         | 4.8 ± 0.1                | 4.2 - 5.8                        |
| Hb (g/dL)                         | 14.9 ± 0.2               | 13 - 17                          |
| Hct (%)                           | 43.7 ± 0.5               | 40 - 51                          |
| PLT (10 <sup>3</sup> /μL)         | 256.4 ± 9.0              | 150 - 380                        |
| MCV (fL)                          | 90.4 ± 0.8               | 85 - 100                         |
| MCH (pg)                          | 30.7 ± 0.3               | 26 - 34                          |
| MCHC (g/dL)                       | 34.0 ± 0.1               | 31 - 34                          |
| Neutrophils (%)                   | 53.6 ± 1.7               | 40 - 75                          |
| Lymphocytes (%)                   | 35.2 ± 1.6               | 21 - 50                          |
| Monocytes (%)                     | 8.2 ± 0.3                | 4 - 10                           |
| Eosinophils (%)                   | 2.4 ± 0.3                | 0 - 7                            |
| Basophils (%)                     | 0.7 ± 0.1                | 0 - 2                            |
| <b>Blood chemistry test</b>       |                          |                                  |
| ALT (IU/L)                        | 20.9 ± 2.3               | 0 - 41                           |
| AST (IU/L)                        | 19.3 ± 1.2               | 0 - 40                           |
| GGT (U/L)                         | 29.0 ± 3.2               | 0 - 60                           |
| ALP (IU/L)                        | 68.7 ± 5.0               | 35 - 129                         |
| BUN (mg/dL)                       | 11.9 ± 0.5               | 5 - 20                           |
| Creatinine (mg/dL)                | 0.9 ± 0.0                | 0.7 - 1.2                        |
| Total bilirubin (mg/dL)           | 0.8 ± 0.1                | 0 - 1.2                          |
| Uric acid (mg/dL)                 | 6.2 ± 0.2                | 3.6 - 8.6                        |
| Total protein (g/dL)              | 7.2 ± 0.1                | 6.5 - 8.0                        |
| Albumin (g/dL)                    | 4.8 ± 0.1                | 3.5 - 5.2                        |
| Glucose (mg/dL)                   | 96.3 ± 1.3               | 74 - 109                         |
| eGFR (mL/min/1.73m <sup>2</sup> ) | 113.1 ± 2.1              | 60 ≤                             |
| <b>Urine test</b>                 |                          |                                  |
| pH                                | 6.0 ± 0.1                | 5.5 - 7.5                        |
| Specific gravity                  | 1.019 ± 0.002            | 1.010 - 1.025                    |
| Urobilinogen (mg/dL)              | 0.3 ± 0.1                | 0 - 1.0                          |
| Protein (- / trace / +)           | 20 / 9 / 1               | Negative                         |
| Glucose (- / trace / +)           | 30 / 0 / 0               | Negative                         |
| Ketone (- / trace / +)            | 30 / 0 / 0               | Negative                         |
| Blood (- / trace / +)             | 29 / 1 / 0               | Negative                         |
| Bilirubin (- / trace / +)         | 30 / 0 / 0               | Negative                         |
| Nitrite (- / trace / +)           | 30 / 0 / 0               | Negative                         |
| Leukocyte (- / trace / +)         | 30 / 0 / 0               | Negative                         |

1) Mean ± SE (all such values). WBC, white blood cell; RBC, red blood cell; Hb, hemoglobin; Hct, hematocrit; PLT, platelets; MCV, mean corpuscular volume; MCH, mean corpuscular hemoglobin; MCHC, mean corpuscular hemoglobin concentration; ALT, alanine transaminase; AST, aspartate aminotransferase; GGT, gamma- glutamyltransferase; ALP, alkaline phosphatase; BUN, blood urea nitrogen; eGFR, estimated glomerular filtration rate.

2) Normal ranges are from CHA Bundang Medical Center
